# Supplementary material for: Key Predictive Features in the Emergency Department for Healthcare-Associated Infections
Source: Research Square preprint supplement (doi:10.21203/rs.3.rs-7536446/v1), 2025-10-19
Supplement: Supplementary file 1 [file 8db0aaf7463f130e0dd4df27.docx]

**Table A2.**

Patient characteristics concerning ICD-9-CM main diagnosis codes in ED, listed in order of frequency, are reported as the number of cases (%) and Odds Ratio (OR) between HAI and non-HAI groups with 95% confidence intervals (95% CI). P-value < 0.001 was considered statistically significant.

| **ICD-9 Diagnosis codes** | **Total,**  **No.** | **HAI group,**  **No. (%)** | **Non-HAI group,**  **No. (%)** | **Odds Ratio**  **(95% CI)** | **p-value** |
| --- | --- | --- | --- | --- | --- |
| Diseases of the Circulatory System (390-459) | 6,366 (22.10) | 547 (21.40) | 5,819 (22.17) | 0.96 (0.87–1.06) | 0.371 |
| Diseases of the Respiratory System 460-519) | 5,517 (19.15) | 438 (17.14) | 5,079 (19.35) | 0.86 (0.77–0.96) | 0.007 |
| Diseases of the Digestive System (520-579) | 4,183 (14.52) | 326 (12.75) | 3,857 (14.70) | 0.85 (0.75–0.96) | 0.008 |
| Injury and Poisoning (800-999) | 3,585 (12.45) | 157 (6.14) | 3,428 (13.06) | 0.44 (0.37–0.51) | <0.001 |
| Diseases of the Genitourinary System (580-629) | 2,217 (7.70) | 290 (11.35) | 1,927 (7.34) | 1.62 (1.42–1.84) | <0.001 |
| Infectious and Parasitic Diseases (001-139) | 1,668 (5.79) | 462 (18.08) | 1,206 (4.59) | 4.58 (4.08–5.15) | <0.001 |
| Neoplasms (140-239) | 1,585 (5.50) | 113 (4.42) | 1,472 (5.61) | 0.78 (0.64–0.95) | 0.012 |
| Mental Disorders (290-319) | 766 (2.66) | 20 (0.78) | 746 (2.84) | 0.27 (0.17–0.42) | <0.001 |
| Diseases of the Blood (280-289) | 658 (2.28) | 44 (1.72) | 614 (2.34) | 0.73 (0.54–1.00) | 0.046 |
| Endocrine, Nutritional, and Metabolic (240-279) | 570 (1.98) | 52 (2.03) | 518 (1.97) | 1.03 (0.77–1.38) | 0.833 |
| Diseases of the Nervous System, Sense Organs (320-389) | 567 (1.97) | 40 (1.56) | 527 (2.01) | 0.78 (0.56–1.07) | 0.124 |
| Diseases of the Musculoskeletal System (710-739) | 235 (0.82) | 20 (0.78) | 215 (0.82) | 0.95 (0.60–1.51) | 0.844 |
| Diseases of the Skin (680-709) | 82 (0.28) | 7 (0.27) | 75 (0.29) | 0.96 (0.44–2.08) | 0.914 |
| Complications of Pregnancy (630-679) | 36 (0.12) | 0 (0.00) | 36 (0.14) | NA | NA |
| External Causes (E, V codes) | 27 (0.09) | 2 (0.08) | 25 (0.10) | 0.82 (0.19–3.47) | 0.789 |
| Congenital Malformations (740-759) | 16 (0.06) | 0 (0.00) | 16 (0.06) | NA | NA |
