# Supplementary material for: Key Predictive Features in the Emergency Department for Healthcare-Associated Infections
Source: Research Square preprint supplement (doi:10.21203/rs.3.rs-7536446/v1), 2025-10-19
Supplement: Supplementary file 2 [file c1735382b3a483319a31ca4b.docx]

**Table A1**:

List of main comorbidities in order of frequency in subjects with / without healthcare associated infection group (HAI). Data are reported as N. of cases (%), difference as Odds Ratio (OR) with 95% Confidence Intervals (95% CI). Percent of subjects referred to the total number of cases. P value <0.001 for significance.

| **Comorbidities** | **Total, No. (%)** | **HAI group,**  **No. (%)** | **Non-HAI group, No. (%)** | **Odds Ratio**  **(95% CI)** | **P-value** |
| --- | --- | --- | --- | --- | --- |
| DM | 4,768 (16.5) | 503 (19.7) | 4,265 (16.2) | 1.26 (1.14–1.40) | <0.001 |
| ST | 4,628 (16.1) | 499 (19.5) | 4,129 (15.7) | 1.30 (1.17–1.44) | <0.001 |
| D | 3,861 (13.4) | 500 (19.6) | 3,361 (12.8) | 1.66 (1.49–1.84) | <0.001 |
| COPD | 3,750 (13.0) | 400 (15.6) | 3,350 (12.8) | 1.27 (1.13–1.42) | <0.001 |
| CVA | 3,051 (10.6) | 311 (12.1) | 2,740 (10.4) | 1.19 (1.05–1.35) | 0.007 |
| CKD | 2,564 (8.9) | 348 (13.6) | 2,216 (8.4) | 1.71 (1.51–1.93) | <0.001 |
| MI | 2,342 (8.1) | 227 (8.9) | 2,115 (8.1) | 1.11 (0.96–1.28) | 0.146 |
| CHF | 2,207 (7.7) | 233 (9.1) | 1,974 (7.5) | 1.23 (1.07–1.42) | 0.004 |
| HM | 2,168 (7.5) | 246 (9.6) | 1,922 (7.3) | 1.35 (1.17–1.55) | <0.001 |
| LD | 1,613 (5.6) | 172 (6.7) | 1,441 (5.5) | 1.24 (1.05–1.46) | 0.009 |
| CTD | 1,395 (4.8) | 157 (6.1) | 1,238 (4.7) | 1.32 (1.11–1.57) | 0.001 |
| PVD | 766 (2.7) | 86 (3.4) | 680 (2.6) | 1.31 (1.04–1.64) | 0.020 |
| PUD | 592 (2.1) | 57 (2.2) | 535 (2.0) | 1.10 (0.83–1.44) | 0.514 |
| L | 385 (1.3) | 55 (2.1) | 330 (1.3) | 1.73 (1.29–2.30) | <0.001 |
| Ly | 153 (0.5) | 25 (0.9) | 128 (0.5) | 2.02 (1.31–3.10) | 0.001 |
| AIDS | 1 (0.0) | 0 (0.0) | 1 (0.0) | NA | NA |

Abbreviations: diabetes mellitus (DM), solid tumors (ST), dementia (D), chronic obstructive pulmonary disease (COPD), acute cerebrovascular accidents or transient ischemic attacks (CVA), chronic kidney disease (CKD), history of myocardial infarction (MI), congestive heart failure (CHF), hemiplegia (HM), liver disease (LD), connective tissue diseases (CTD), peripheral vascular disease (PVD), peptic ulcer disease (PUD), leukemia (L), lymphoma (Ly), Acquired Immune Deficiency Syndrome (AIDS).
